# Supplementary material for: ANGPTL4 stabilizes atherosclerotic plaques and modulates the phenotypic transition of vascular smooth muscle cells through KLF4 downregulation
Source: PubMed Central journal article supplement (PMC9981608; doi:10.1038/s12276-023-00937-x), 2023-02-13

## Supplementary Information

### **ANGPTL4 stabilizes atherosclerotic plaques and modulates phenotypic transition of vascular smooth muscle cells through KLF4 downregulation**

Dong Im Cho<sup>1,7\*</sup>, Min Joo Ahn<sup>2\*</sup>, Hyang Hee Cho<sup>1,7</sup>, Meeyoung Cho<sup>1,7</sup>, Ju Hee Jun<sup>1,7</sup>, Bo Gyeong Kang<sup>1,7</sup>,  
Soo yeon Lim<sup>1,7</sup>, Soo Ji Yoo<sup>1,7</sup>, Mi Ra Kim<sup>1</sup>, Hyung-Seok Kim<sup>3</sup>, Su-Jin Lee<sup>3</sup>, Le Thanh Dat<sup>4</sup>, Changho Lee<sup>4,5</sup>,  
Yong Sook Kim<sup>1,6#</sup>, Youngkeun Ahn<sup>1,2,7#</sup>

<sup>1</sup>Cell Regeneration Research Center, <sup>2</sup>Department of Cardiology, Chonnam National University Hospital <sup>3</sup>Department of Forensic Medicine, Chonnam National University Medical School, <sup>4</sup>Department of Artificial Intelligence Convergence, Chonnam National University, <sup>5</sup>Department of Nuclear Medicine, Chonnam National University Medical School & Hwasun Hospital, <sup>6</sup>Biomedical Research Institute, Chonnam National University Hospital, <sup>7</sup>Department of Cardiology, Chonnam National University Medical School, Gwangju, Republic of Korea

\* Authors contributed equally

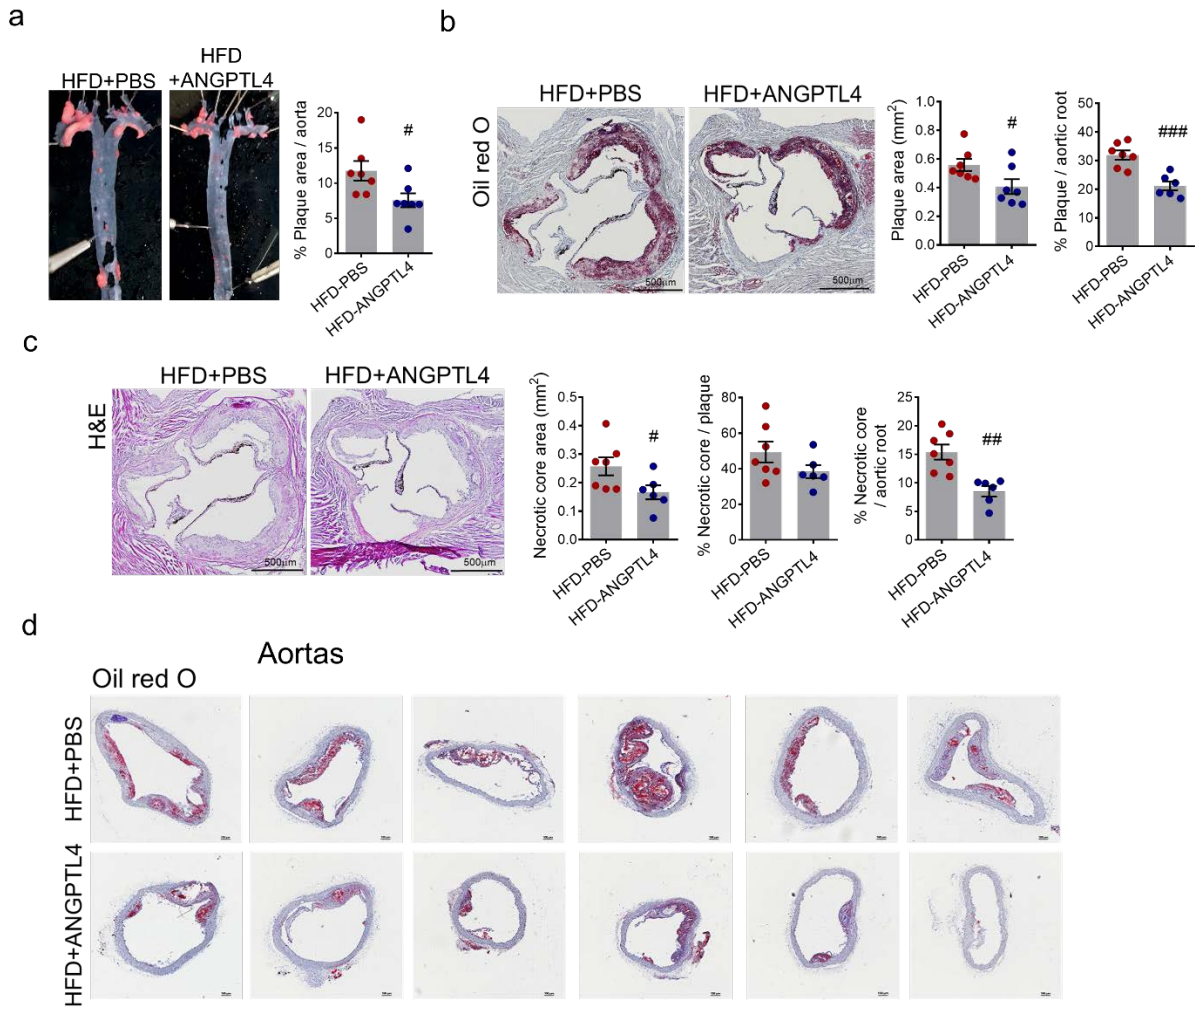

**Supplementary Fig 1. The effect of ANGPTL4 administration was examined in a high-fat diet (HFD)-fed *Ldlr*<sup>-/-</sup> mouse model.**

*Ldlr*<sup>-/-</sup> mice were fed a HFD with injection of PBS or recombinant ANGPTL4 protein (2 µg per mouse, intraperitoneally twice a week) for 16 weeks, and atherosclerotic plaque area was quantified. **a**, Representative Oil-red O-stained aortas from PBS-injected and ANGPTL4-injected *Ldlr*<sup>-/-</sup> mice and atherosclerotic plaque area were quantified. **b**, Lesion area measured in Oil-red O-stained cross-sections of the aortic roots from the PBS group and ANGPTL4 group. Plaque area was measured and quantified as the relative size of plaque to the aortic area. Scale bar, 500 µm. **c**, Representative images are shown for H&E-stained aortic root from the PBS and ANGPTL4 groups. Necrotic core area, qualified by anucleated area, was measured and quantified as the relative size of the necrotic core to plaque or aortic root. Scale bar, 500 µm. **d**, Representative images are shown for Oil-red O-stained aortas from the PBS and ANGPTL4 groups. Scale bar, 100 µm. Data are represented as mean ± SEM. #*p* < 0.05, ##*p* < 0.01, ###*p* < 0.001 (by Student's *t*-test).

## Circulating level

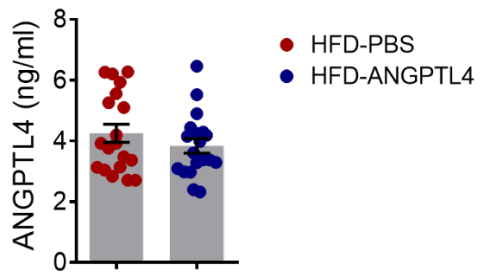

**Supplementary Fig. 2.** ANGPTL4 expression from plasma of *ApoE*<sup>-/-</sup> mice.

Circulating ANGPTL4 was quantified in the PBS and ANGPTL4 groups.

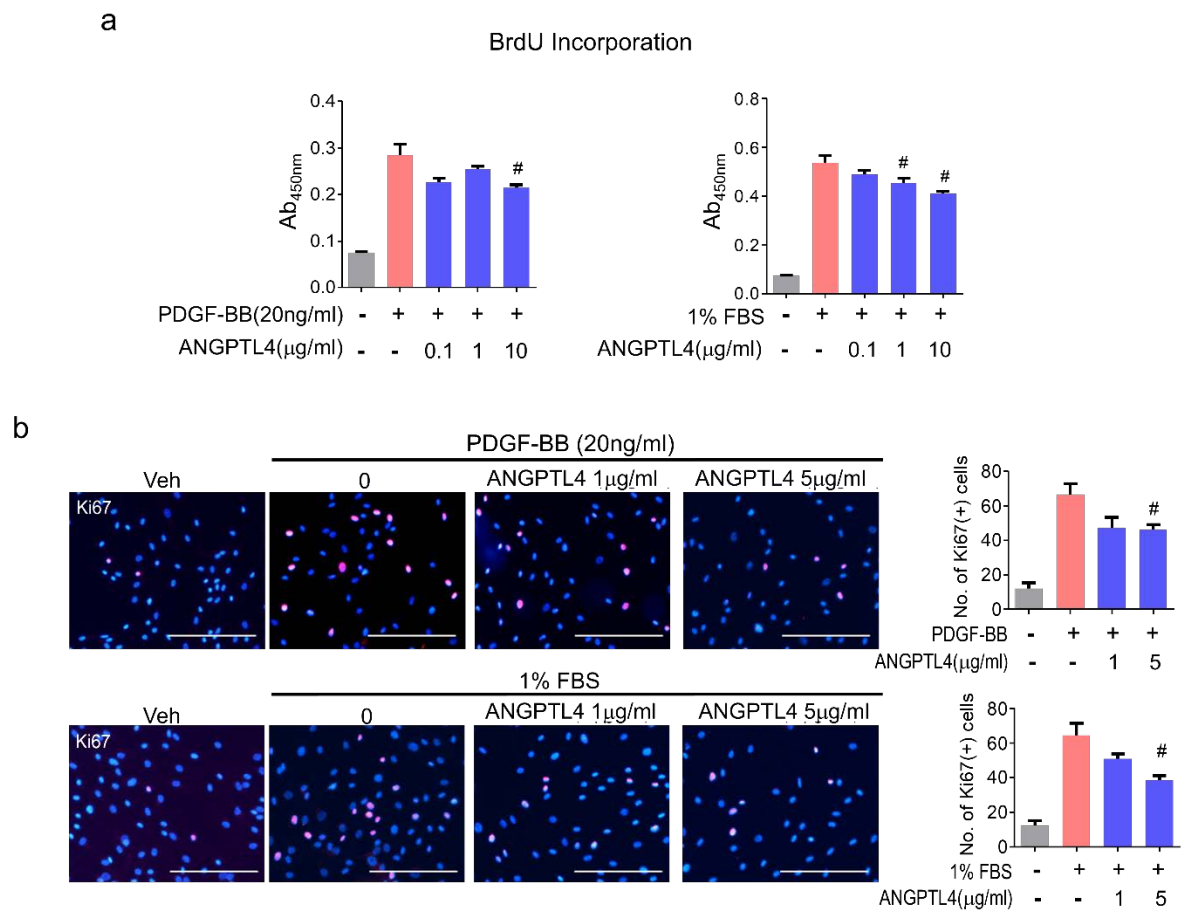

**Supplementary Fig 3. The effect of ANGPTL4 on proliferation in human aortic SMCs.**

**a**, Proliferation assay using a measurement of BrdU incorporation in human aortic SMCs. Cell proliferation was initiated with platelet-derived growth factor PDGF-BB (20 ng/mL) or 1% FBS in the presence of ANGPTL4 (0.1, 1, or 10 µg/mL). **b**, Cell proliferation marker Ki67-positive cells were counted in human aortic SMCs stimulated with PDGF-BB or 1% FBS in the presence of ANGPTL4 (1, or 5 µg/mL). Scale bar, 200 µm. Data are represented as mean ± SEM. #*p* < 0.05 (by one-way ANOVA with Bonferroni's multiple-comparisons test).

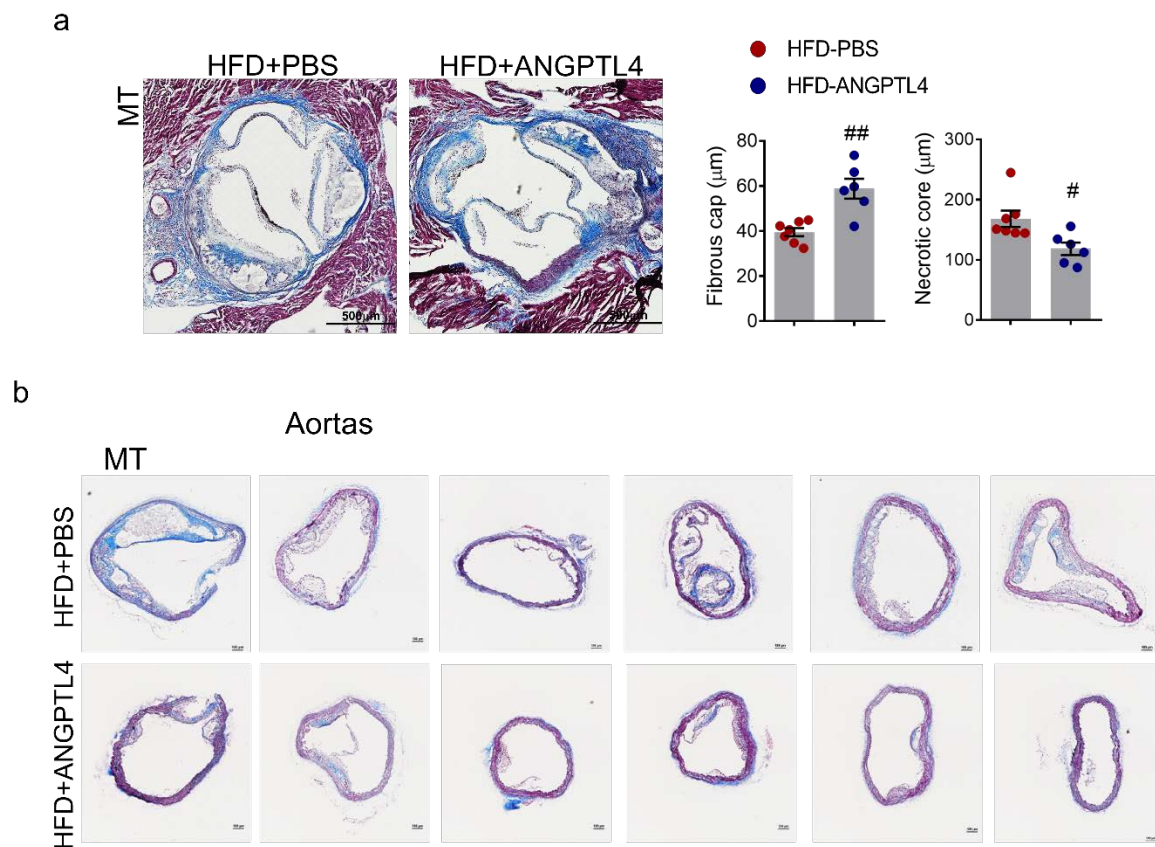

**Supplementary Fig 4. Effects of ANGPTL4 on the stability of atherosclerotic plaque in the HFD-fed *Ldlr*<sup>-/-</sup> mouse model.**

**a**, The thickness of the fibrous cap and the necrotic core in the *Ldlr*<sup>-/-</sup> mouse atherosclerosis model was measured from Masson trichrome staining. Scale bar, 500 μm. **b**, Representative images are shown for Masson trichrome-stained aortas from the PBS and ANGPTL4 groups. Scale bar, 100 μm. Data are represented as mean ± SEM. # $p < 0.05$ , ## $p < 0.001$  (by Student's *t*-test).

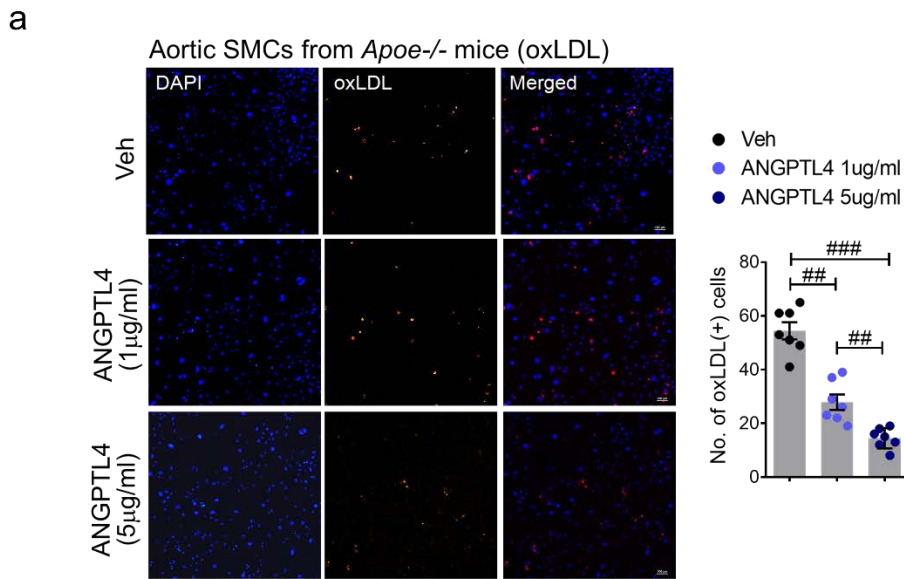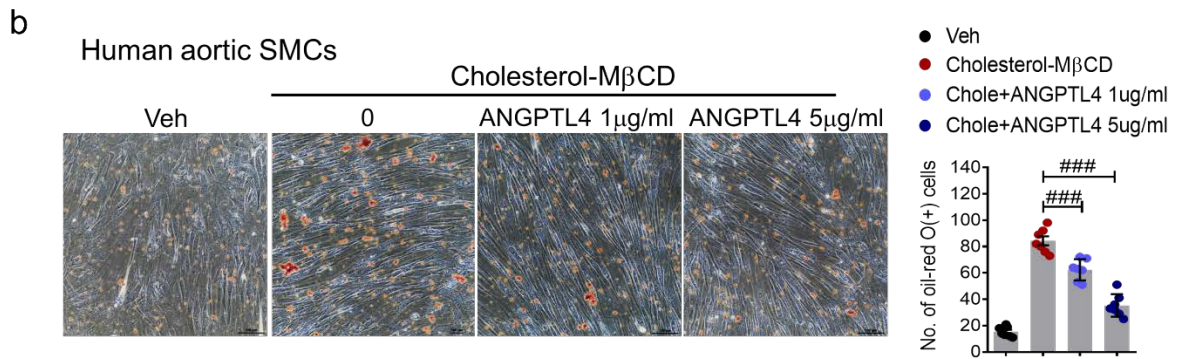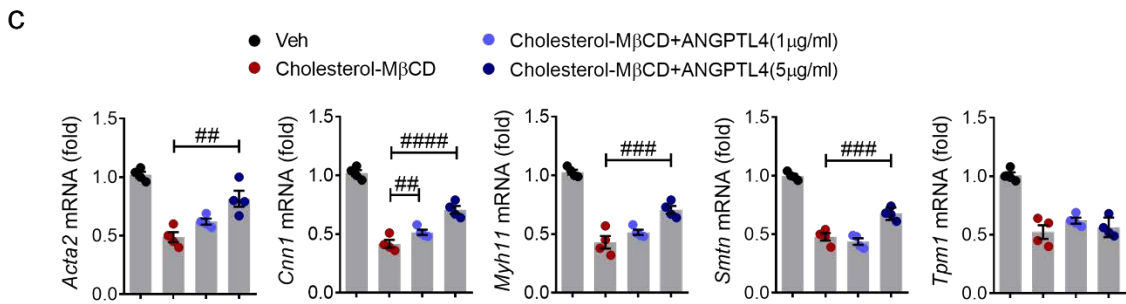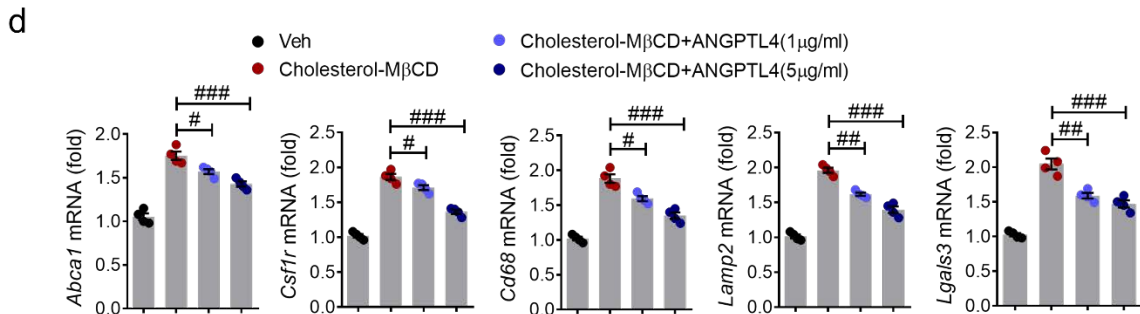

**Supplementary Fig 5.** The effect of ANGPTL4 treatment on lipid uptake and phenotypic change of SMCs.

**a**, Aortic SMCs isolated from *Apoe*<sup>-/-</sup> mice were treated with Dil-oxLDL (10 µg/ml) with or without ANGPTL4 for 24 h and then oxLDL uptake was analyzed. Scale bar, 100 µm. **b**, Human aortic SMCs with cholesterol with or without ANGPTL4 were analyzed using Oil-red O staining. Scale bar, 100 µm. Mouse aortic SMCs were stimulated with cholesterol (10 µg/ml) with or without ANGPTL4, and the relative expression of genes related to contractile (**c**) and macrophage (**d**) markers was analyzed by real-time PCR. Data are represented as mean ± SEM. #*p* < 0.05, ##*p* < 0.01, ###*p* < 0.001, ####*p* < 0.0001 (by one-way ANOVA with Bonferroni's multiple-comparisons test).



a

Aortic SMCs from *Apoe*<sup>-/-</sup> mice

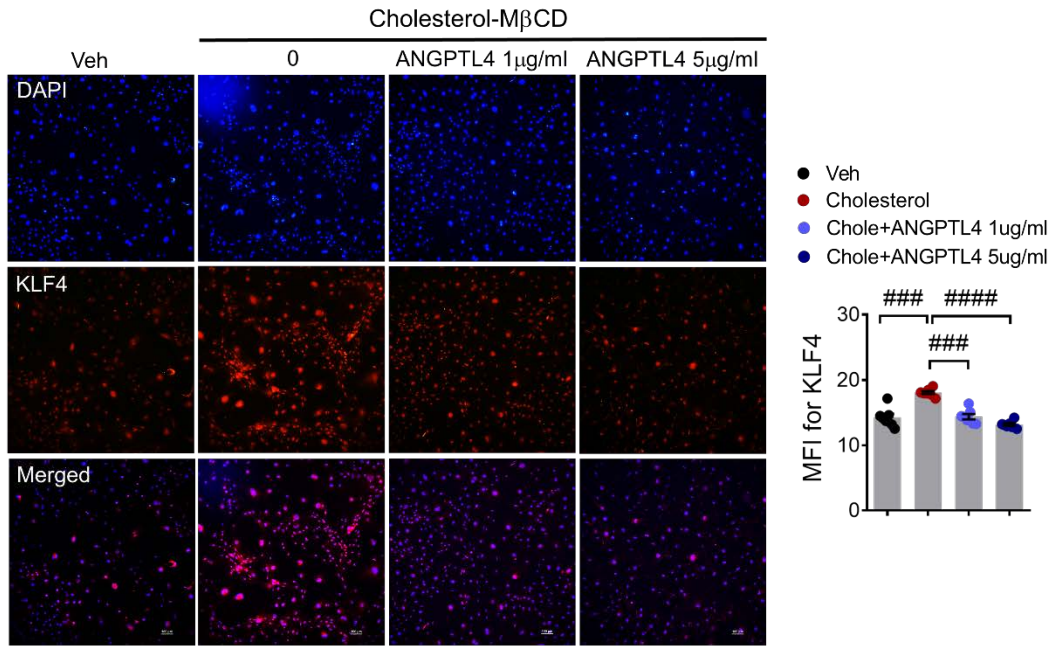

b

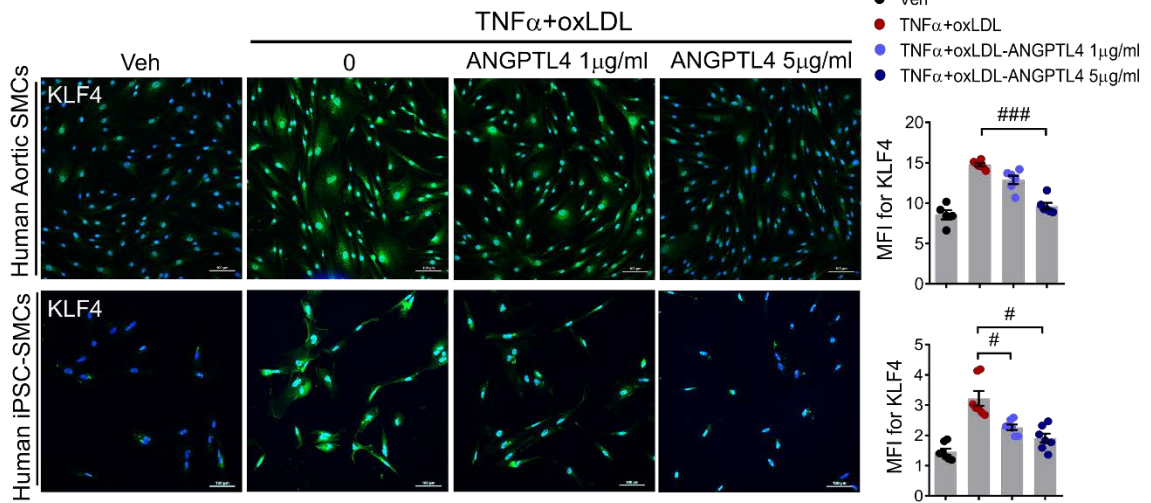

**Supplementary Fig 6.** Immunofluorescence staining of KLF4 expression in SMCs.

**a**, Aortic SMCs isolated from *ApoE*<sup>-/-</sup> mice were pretreated with ANGPTL4 for 24 h and then stimulated with cholesterol (10  $\mu$ g/ml) for 72 h and stained with KLF4. Mean fluorescence intensity of KLF4 was quantified. Scale bar, 100  $\mu$ m. **b**, Human aortic SMCs and iPSC-SMCs were stimulated with oxLDL (10  $\mu$ g/ml) and TNF $\alpha$  (100 ng/ml) with or without ANGPTL4 (1  $\mu$ g/ml, 5  $\mu$ g/ml) and stained with KLF4. Scale bar, 100  $\mu$ m. Data are represented as mean  $\pm$  SEM. # $p$ <0.05, ### $p$  < 0.001, #### $p$  < 0.0001 (by one-way ANOVA with Bonferroni's multiple-comparisons test).

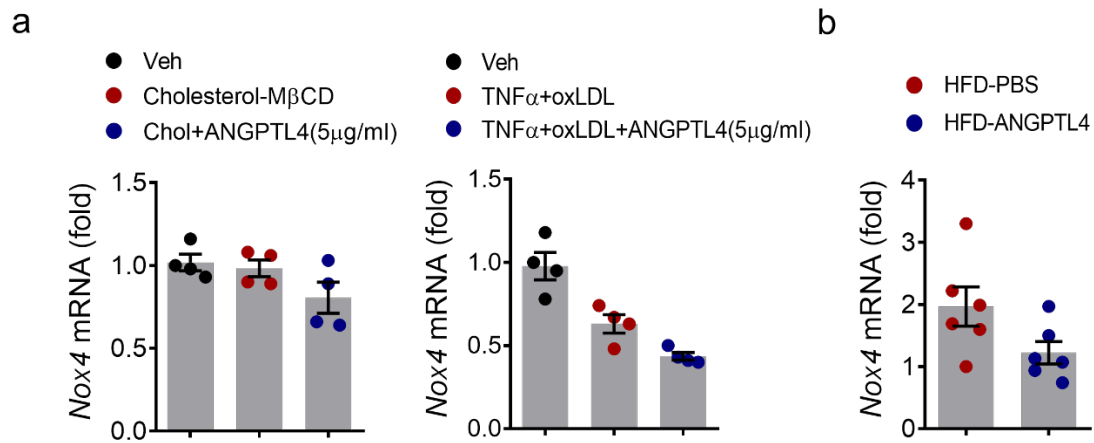

**Supplementary Fig 7. Expression patterns of NOX4 in SMCs and aortas of *Apoe*<sup>-/-</sup> mice.**

**a**, Aortic SMCs from atherosclerotic *Apoe*<sup>-/-</sup> mice were pretreated with ANGPTL4 and cholesterol (10  $\mu$ g/ml) or oxLDL (10  $\mu$ g/ml) and TNF $\alpha$  (100 ng/ml) and the level of Nox4 was measured. **b**, Aortas were isolated from atherosclerotic *Apoe*<sup>-/-</sup> mice treated with PBS or ANGPTL4, and the level of NOX4 was measured.

a

Human ELISA standard curve

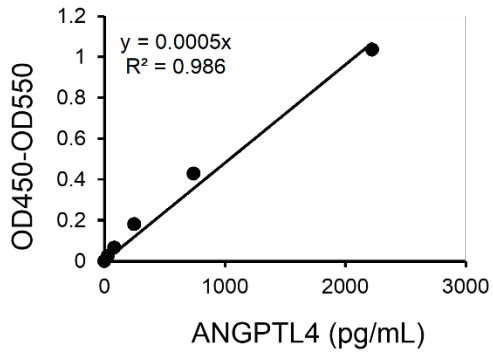

b

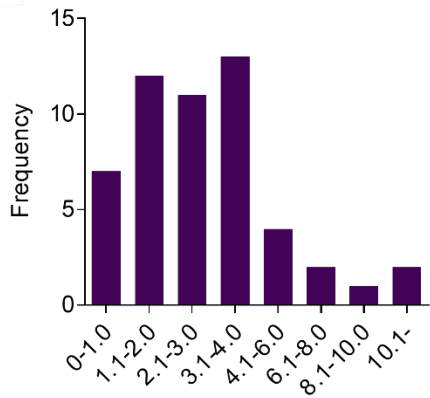

c

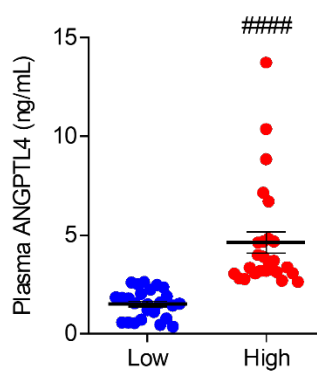

d

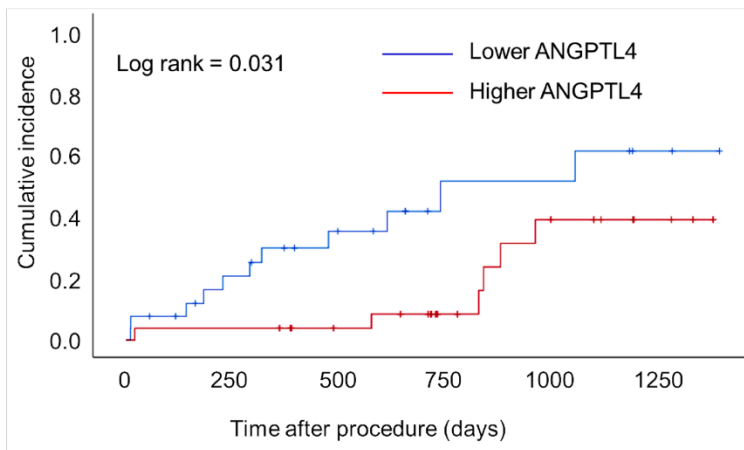

**Supplementary Fig 8.** Association of circulating ANGPTL4 levels with the incidence of heart failure. **a**, Standard curve for human ANGPTL4 ELISA. **b**, Distribution of plasma levels of ANGPTL4 measured in all patients (n=52). **c**, Plasma levels of ANGPTL4 in the Low ANGPTL4 (n=26) and high ANGPTL4 (n=26) groups. **d**, Kaplan-Meier curve illustrating vascular event incidence of patients during the follow-up period after surgery, based on plasma ANGPTL4 levels above (red) and below (blue) the median value. Data are represented as mean  $\pm$  SEM. #####  $p < 0.0001$  (by Student's *t*-test).

**Supplementary Table 1. List of real-time PCR primers**

| Gene                   | Primer                                                                            |
|------------------------|-----------------------------------------------------------------------------------|
| Mouse <i>Angptl4</i>   | Forward : 5'-GGACCTTAACTGTGCCAAGA-3'<br>Reverse: 5'-CGTGGGATAGAGTGGAAGTATTG-3'    |
| Mouse <i>Gapdh</i>     | Forward : 5'-GGGTGTGAACACGAGAAATA-3'<br>Reverse: 5'-GTCATGAGCCCTTCCACAAT-3'       |
| Mouse <i>Tnfrsf11b</i> | Forward: 5'-GCCGAGAGTGTAGAGAGGATAA-3'<br>Reverse: 5'-CTTACCATTTCCTGGTCTCTG-3'     |
| Mouse <i>Tlr4</i>      | Forward: 5'-GCTTACACCACCTCTCAAAC-3'<br>Reverse: 5'-ACAGCCACCAGATTCTCTAAAC-3'      |
| Mouse <i>Icam1</i>     | Forward: 5'-CTGTTTGTAGCTGAGCGAGAT-3'<br>Reverse: 5'-AACGAATACACGGTGATGGTAG-3'     |
| Mouse <i>Vcam1</i>     | Forward : 5'-CACAGCTCAGTGGACTGGAA-3'<br>Reverse: 5'-CCACCACCACACCCATAGA-3'        |
| Mouse <i>Il10</i>      | Forward: 5'-ACAGCCGGGAAGACAATAAC-3'<br>Reverse: 5'-CAGCTGGTCCTTTGTTTGAAAG-3'      |
| Mouse <i>Myh11</i>     | Forward: 5'-GATGAAGAGATCGCCCAGAAA-3'<br>Reverse: 5'-CTCTGAGTCTAGGTCTCTTGT-3'      |
| Mouse <i>Smtn</i>      | Forward: 5'-GAGAAGTGGCTACACTCTCAAC-3'<br>Reverse: 5'-GTCAACTCCTCGACATCATTCA-3'    |
| Mouse <i>Tagln</i>     | Forward: 5'-GGAACAGGTGGCTCAATTCT-3'<br>Reverse: 5'-GCTGCCATATCCTTACCTTCAT-3'      |
| Mouse <i>Myl9</i>      | Forward: 5'-CAGAACCGAGATGGCTTCATT-3'<br>Reverse: 5'-GTTTCATCATGCCCTCCAGATAC-3'    |
| Mouse <i>Klf4</i>      | Forward: 5'- GACCTCCTGGACCTAGACTTTA-3'<br>Reverse: 5'- GAAGACGAGGATGAAGCTGAC-3'   |
| Mouse <i>Arg1</i>      | Forward: 5'-GATTATCGGAGCGCCTTCT-3'<br>Reverse: 5'-AAGAATGGAAGAGTCAGTGTGG-3'       |
| Mouse <i>Nos2</i>      | Forward: 5'- GGAATCTTGGAGCGAGTTGT-3'<br>Reverse: 5'- CCTCTTGTCTTTGACCCAGTAG -3'   |
| Mouse <i>Ccl2</i>      | Forward: 5'- GGAATCTTGGAGCGAGTTGT-3'<br>Reverse: 5'- CCTCTTGTCTTTGACCCAGTAG -3'   |
| Mouse <i>Acta2</i>     | Forward: 5'- TCAGGGAGTAATGGTTGGAATG-3'<br>Reverse: 5'- GGTGATGATGCCGTGTTCTA -3'   |
| Mouse <i>Cnn1</i>      | Forward: 5'- TTGAGAGAAGGCAGGAACATC-3'<br>Reverse: 5'- GTACCCAGTTTGGGATCATAGAG -3' |
| Mouse <i>Cd68</i>      | Forward: 5'-GACCCACAACCTGTCCTCATAA -3'<br>Reverse: 5'-CTTCCACCCTGAATTGGGTATAG-3'  |
| Mouse <i>Abca1</i>     | Forward: 5'-GGGTGGTGTTCCTCATTAC-3'<br>Reverse: 5'- CACATCCTCATCCTCGTCATTTC-3'     |
| Mouse <i>Lgals3</i>    | Forward: 5'- ACACGAAGCAGGACAATAACT-3'<br>Reverse: 5'- CAGCTTCAACCAGGACTTGTA-3'    |

|                    |                                                                                  |
|--------------------|----------------------------------------------------------------------------------|
| Mouse <i>Lamp2</i> | Forward: 5'- TTCAACACCCACTCCAACCTC-3'<br>Reverse: 5'- TAGCCAGCAGACAGGTAGTAT-3'   |
| Mouse <i>Csf1r</i> | Forward: 5'- CTGGGACAGCACGAGAATATAG-3'<br>Reverse: 5'- CCTTCGGAGAAAGTTGAGTAGG-3' |
| Mouse <i>Tpm1</i>  | Forward: 5'- GAGAGTGAGAGAGGCATGAAAG-3'<br>Reverse: 5'- CATACTCCGGTCAGCATCTT-3'   |
| Mouse <i>Nox1</i>  | Forward: 5'- CGAGGCTTTAGCATGGAAGTA-3'<br>Reverse: 5'- CAGAAGTCAGAGTGAAGGGATG-3'  |
| Mouse <i>Nox4</i>  | Forward: 5'- CCAGAATGAGGATCCCAGAAAG-3'<br>Reverse: 5'- GGTAGAAGCTGTAACCATGAGG-3' |

**Supplementary Table 2. List of genotyping primers**

| Gene                             | Primer                                                                                               |
|----------------------------------|------------------------------------------------------------------------------------------------------|
| Mouse <i>Ldlr</i> <sup>-/-</sup> | Forward: 5'-GCT CCA TAG GCT ATC TGC TC-3'<br>Reverse: 5'-GTG TCG TAG GAC AAG TTA GG-3'               |
| Mouse <i>ApoE</i> <sup>-/-</sup> | P1 : 5'-GCCTAGCCGAGGGAGAGCCG-3'<br>P2 : 5'-TGTGACTTGGGAGCTCTGCAGC-3'<br>P3 : 5'-GCCGCCCGACTGCATCT-3' |



**Supplementary Table 3. List of commercial antibodies**

| Antibodies                   | Supplier      | Identifier | Application            |
|------------------------------|---------------|------------|------------------------|
| CD68                         | Abcam         | ab125212   | IHC 1:100              |
| Mac2                         | Cedarlane     | CL8942AP   | IHC 1:200              |
| $\alpha$ -SMA                | Sigma-Aldrich | A2547      | IHC 1:100              |
| SM-MHC                       | OriGene       | TA323338   | IHC 1:100              |
| SM22 $\alpha$                | Abcam         | Ab14106    | IHC 1:200              |
| Ki67                         | Abcam         | Ab15580    | ICC 1:100              |
| KLF4                         | Abcam         | Ab106629   | IHC 1:100<br>WB 1:1000 |
| CD11b(M1/70), PE             | eBioscience   | 12-0112    | FC                     |
| CD45(30-F11), Pacific Blue   | eBioscience   | MCD4528    | FC                     |
| CD80(B7-1), PerCP Cyanine5.5 | BioLegend     | 104721     | FC                     |
| F4/80 (BM-8), APC            | eBioscience   | 17-4801-82 | FC                     |
| Human IgG Fc (HP6017)        | BioLegend     | 409303     | FC                     |

WB, Western Blot; IHC, Immunohistochemistry; ICC, Immunocytochemistry; FC, Flow Cytometry

**Supplementary Table 4. Baseline Clinical Characteristics**

| Factor                          | Low ANGPTL4<br>(n=26) | High ANGPTL4<br>(n=26) | P value          |
|---------------------------------|-----------------------|------------------------|------------------|
| Age (years)                     | 69.4±12.2             | 70.0±11.4              | 0.852            |
| Men, n (%)                      | 16 (61.5)             | 22 (84.6)              | 0.061            |
| Systolic BP (mmHg)              | 123.1±40.8            | 119.6±19.7             | 0.280            |
| Heart rate (/min)               | 85.9±20.6             | 81.7±20.9              | 0.466            |
| Current or ex-smoker, n (%)     | 15 (57.7)             | 19 (73.1)              | 0.244            |
| Hypertension, n (%)             | 19 (73.1)             | 11 (42.3)              | <b>0.025</b>     |
| Diabetes mellitus, n (%)        | 16 (61.5)             | 10 (38.5)              | 0.096            |
| Dyslipidemia, n (%)             | 8 (30.8)              | 4 (15.4)               | 0.188            |
| BMI (kg/m <sup>2</sup> )        | 23.8±4.1              | 24.0±3.3               | 0.839            |
| Obesity, n (%)                  | 9 (34.6)              | 10 (38.5)              | 0.773            |
| Familial history of CAD, n (%)  | 1 (3.8)               | 0 (0)                  | 1.000            |
| Previous MI, n (%)              | 3 (11.5)              | 5 (19.2)               | 0.703            |
| Previous HF, n (%)              | 2 (7.7)               | 1 (3.8%)               | 1.000            |
| ANGPTL4 levels (ng/mL)          | 1.53±0.72             | 4.64±2.69              | <b>&lt;0.001</b> |
| Serum creatinine (mg/dL)        | 1.5±1.3               | 1.3±1.0                | 0.545            |
| Peak troponin-I (mg/dL)         | 60.1±79.0             | 68.6±62.0              | 0.253            |
| Peak CK-MB (mg/dL)              | 57.1±91.2             | 93.0±100.1             | 0.210            |
| Total cholesterol (mg/dL)       | 159.7±40.6            | 165.6±44.5             | 0.503            |
| Triglyceride (mg/dL)            | 111.2±58.0            | 117.8±85.3             | 1.000            |
| HDL-cholesterol (mg/dL)         | 42.9±10.3             | 41.9±12.6              | 0.515            |
| LDL-cholesterol (mg/dL)         | 100.7±30.5            | 103.3±34.8             | 0.813            |
| Serum glucose (mg/dL)           | 220.9±137.7           | 140.2±44.1             | <b>0.012</b>     |
| N-terminal pro BNP (pg/mL)      | 3,692.0±4825.3        | 7,169.3±11960.2        | 0.627            |
| High-sensitivity CRP (mg/L)     | 3.6±5.9               | 2.3±4.0                | 0.493            |
| Left ventricular EF (%)         | 45.8±10.9             | 48.5±10.7              | 0.374            |
| Medications at discharge, n (%) |                       |                        |                  |
| Aspirin                         | 26 (100)              | 26 (100)               | 1.000            |
| Clopidogrel                     | 18 (69.2)             | 11 (42.3)              | 0.051            |
| Prasugrel or Ticagrelor         | 10 (38.5)             | 18 (69.2)              | <b>0.026</b>     |
| Beta-blocker                    | 21 (80.8)             | 24 (92.3)              | 0.419            |
| ACEi or ARB                     | 24 (92.3)             | 24 (92.3)              | 1.000            |
| Aldosterone antagonist          | 7 (26.9)              | 12 (46.2)              | 0.150            |
| Statin                          | 24 (92.3)             | 26 (100)               | 0.490            |

Values are presented as mean±SD, median [interquartile range] or number (percentage). ACEi, angiotensin-converting enzyme inhibitor; ARB, angiotensin-II receptor blocker; BNP, brain-type natriuretic peptide; BP, blood pressure; CAD, coronary artery disease; CK-MB, creatine kinase-myocardial band isoenzyme; CRP, C-reactive protein; EF, ejection fraction; HDL, high-density lipoprotein; LDL, low-density lipoprotein.

**Supplementary Table 5. Coronary Angiographic and Procedural Characteristics**

| Factor                            | Low ANGPTL4<br>(n=21) | High ANGPTL4<br>(n=21) | P value |
|-----------------------------------|-----------------------|------------------------|---------|
| Culprit LAD, n (%)                | 12 (46.2)             | 17 (65.4%)             | 0.163   |
| MVD, n (%)                        | 13 (50.0)             | 13 (50.0)              | 1.000   |
| ACC/AHA B2/C lesion, n (%)        | 26 (100)              | 25 (96.2)              | 1.000   |
| Pre-PCI TIMI flow grade 0, n (%)  | 14 (58.3)             | 10 (38.5)              | 0.266   |
| Symptom-to-balloon time (min)     | 2482.7±4130.7         | 1752.7±2865.6          | 0.260   |
| Post-PCI TIMI flow grade 3, n (%) | 26 (100)              | 26 (100)               | 1.000   |

Values are presented as mean±SD or number (percentage). ACC, American College of Cardiology; AHA, American Heart Association; LAD, left anterior descending; MVD, multivessel disease; PCI, percutaneous coronary intervention; TIMI, thrombolysis in myocardial infarction.

**Supplementary Table 6. Factors Associated with Recurred Heart Failure**

| Factor                              | Crude Hazard Ratio on Univariate Analysis (95% CI) | P value | Adjusted Hazard Ratio on Multivariate Analysis (95% CI) | P value      |
|-------------------------------------|----------------------------------------------------|---------|---------------------------------------------------------|--------------|
| Age (per year increase)             | 1.078 (1.026-1.133)                                | 0.003   | 1.098 (1.023-1.179)                                     | <b>0.010</b> |
| Male                                | 1.730 (0.603-4.962)                                | 0.308   |                                                         | 0.326        |
| Killip class 3                      | 2.762 (1.012-7.537)                                | 0.047   | 2.363 (0.254-22.007)                                    | 0.450        |
| Hypertension                        | 0.797 (0.488-1.302)                                | 0.365   |                                                         |              |
| Diabetes mellitus                   | 0.936 (0.580-1.511)                                | 0.788   |                                                         |              |
| Dyslipidemia                        | 0.848 (0.479-1.501)                                | 0.571   |                                                         |              |
| Obesity                             | 2.250 (0.730-6.939)                                | 0.158   |                                                         |              |
| Smokers                             | 0.775 (0.286-2.101)                                | 0.616   |                                                         |              |
| Family history                      | 4.557 (0-190080.174)                               | 0.780   |                                                         |              |
| Previous HF                         | 4.707 (0.020-1115.518)                             | 0.579   |                                                         |              |
| Previous MI                         | 0.832 (0.444-1.559)                                | 0.566   |                                                         |              |
| Systolic blood pressure             | 1.003 (0.988-1.020)                                | 0.670   |                                                         |              |
| Heart rate                          | 1.006 (0.985-1.026)                                | 0.599   |                                                         |              |
| Pain to balloon time                | 1.000 (1.000-1.000)                                | 0.115   | 1.001 (1.000-1.001)                                     | 0.201        |
| MVD                                 | 1.031 (0.396-2.685)                                | 0.951   |                                                         |              |
| Culprit LAD                         | 0.872 (0.320-2.374)                                | 0.788   |                                                         |              |
| Creatinine                          | 1.334 (1.202-1.745)                                | 0.035   | 1.277 (0.854-1.908)                                     | 0.234        |
| ANGPTL4 levels                      | 0.465 (0.296-0.729)                                | 0.001   | 0.338 (0.166-0.686)                                     | <b>0.003</b> |
| Peak CK-MB                          | 0.996 (0.990-1.002)                                | 0.231   |                                                         |              |
| Peak troponin-I                     | 0.995 (0.986-1.003)                                | 0.186   | 0.998 (0.981-1.014)                                     | 0.763        |
| hsCRP                               | 1.131 (1.024-1.249)                                | 0.016   | 1.096 (0.973-1.234)                                     | 0.131        |
| Initial LVEF                        | 0.990 (0.942-1.040)                                | 0.686   |                                                         |              |
| Beta-blocker at discharge           | 0.549 (0.200-1.511)                                | 0.246   |                                                         |              |
| ACEi or ARB at discharge            | 0.042 (0.000-45.106)                               | 0.373   |                                                         |              |
| Aldosterone antagonist at discharge | 1.338 (0.793-2.256)                                | 0.275   |                                                         |              |
| Use of statin at discharge          | 1.082 (0.393-2.977)                                | 0.879   |                                                         |              |

ACEi, angiotensin-converting enzyme inhibitor; ANGPTL4, angiotensin like 4; ARB, angiotensin-II receptor blocker; CAD, coronary artery disease; CI, confidence interval; CK-MB, creatine kinase-myocardial band isoenzyme; HF, heart failure; hsCRP, high-sensitivity C-reactive protein, LAD, left anterior descending; LVEF, left ventricular ejection fraction; MI, myocardial infarction; MVD, multivessel disease.

Full unedited gel for Figure 6C- KLF4 &  $\beta$ -actin

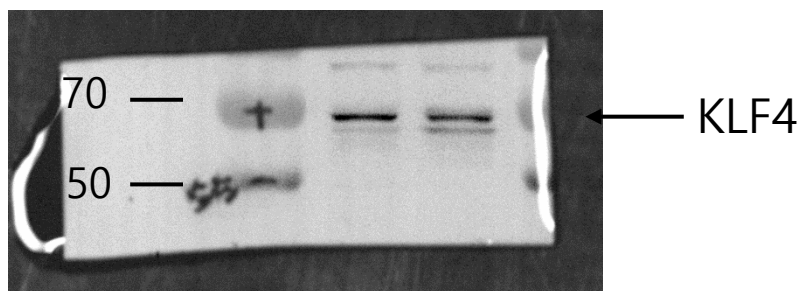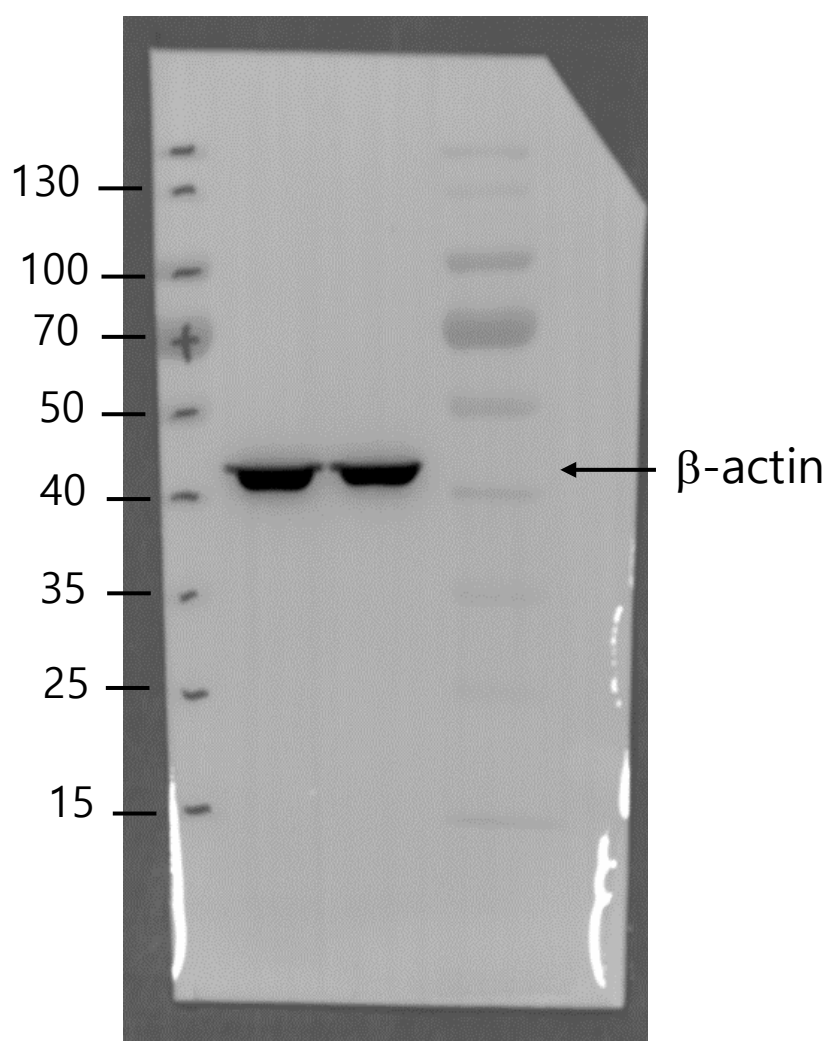

Full unedited gel for Figure 6D- KLF4 & GAPDH

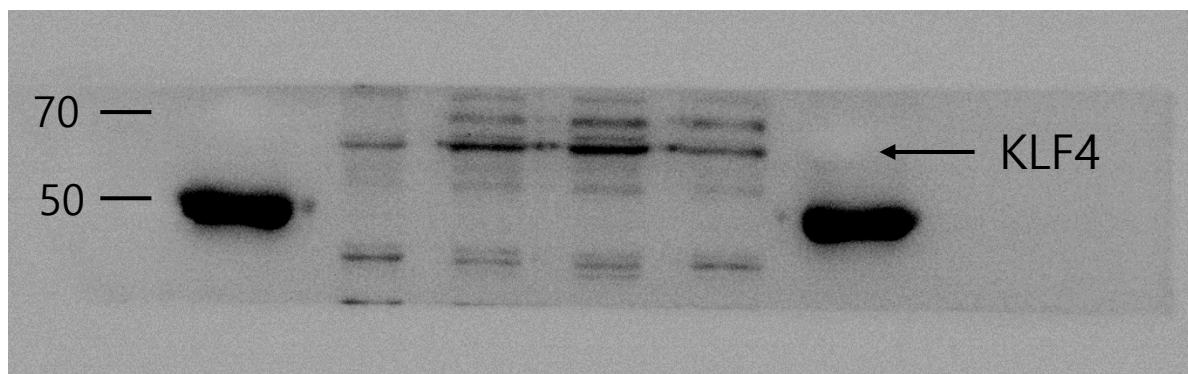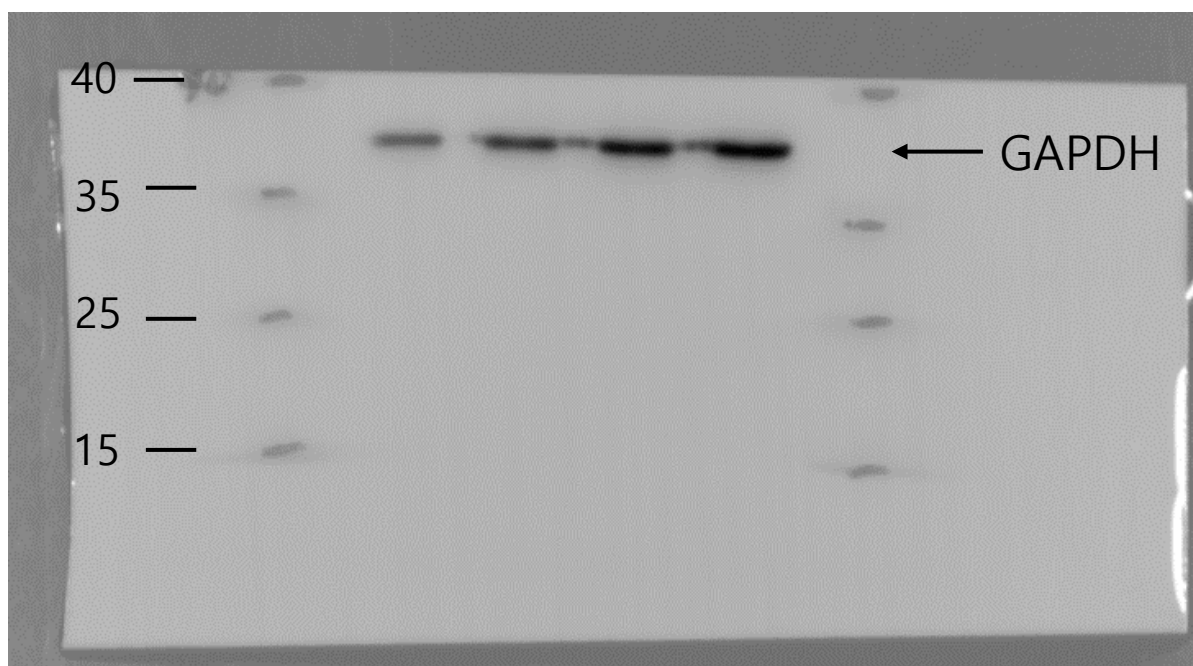

Supplement: 12276_2023_937_MOESM1_ESM.pdf [file 12276_2023_937_MOESM1_ESM.pdf]
